# Supplementary material
Source: PubMed Central journal article supplement (PMC3139538)
Supplement: Supp_Fig.pdf [file Supp_Fig.pdf]

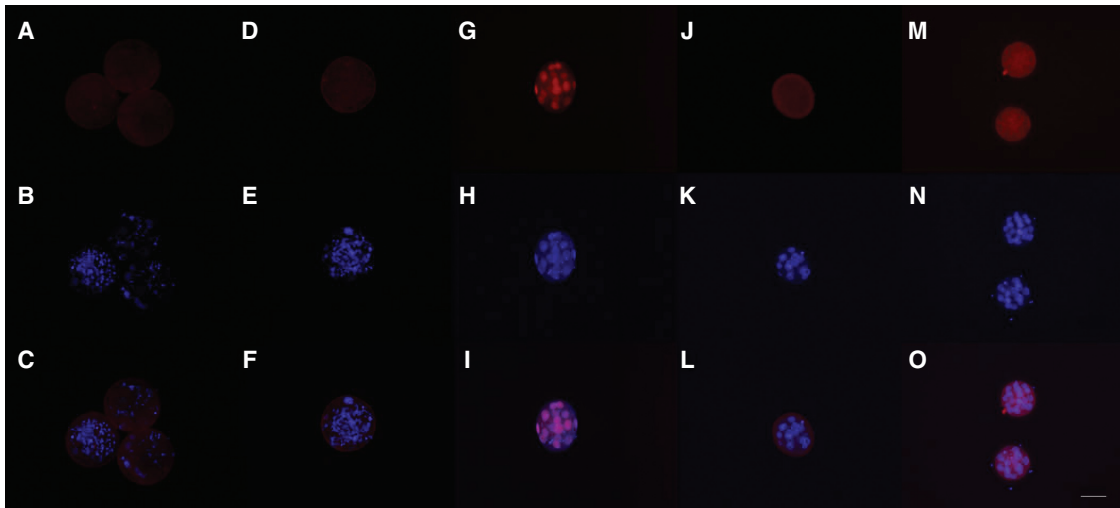

**SUPPLEMENTARY FIG. 1.** Control staining with mouse IgG (A–C) and goat IgG (D–F). Immunofluorescent staining of OCT4 (G–I), NANOG (J–L), and CDX2 (M–O) in rhesus macaque 12–20 cell embryos. Nuclei were counterstained with DAPI (B, E, H, K, and N), with merged images presented (C, F, I, L, and O). Nuclear localization of OCT4 was apparent in 16+ cell embryos, while NANOG and CDX2 were not localized to the nucleus during these earlier stages. Bar = 200  $\mu$ m.
